# Supplementary material for: Mitochondrial Genomes of Two Thaparocleidus Species (Platyhelminthes: Monogenea) Reveal the First rRNA Gene Rearrangement among the Neodermata
Source: MDPI journal article supplement (doi:10.3390/ijms20174214), 2019-08-28
Supplement: s1 [file s1]

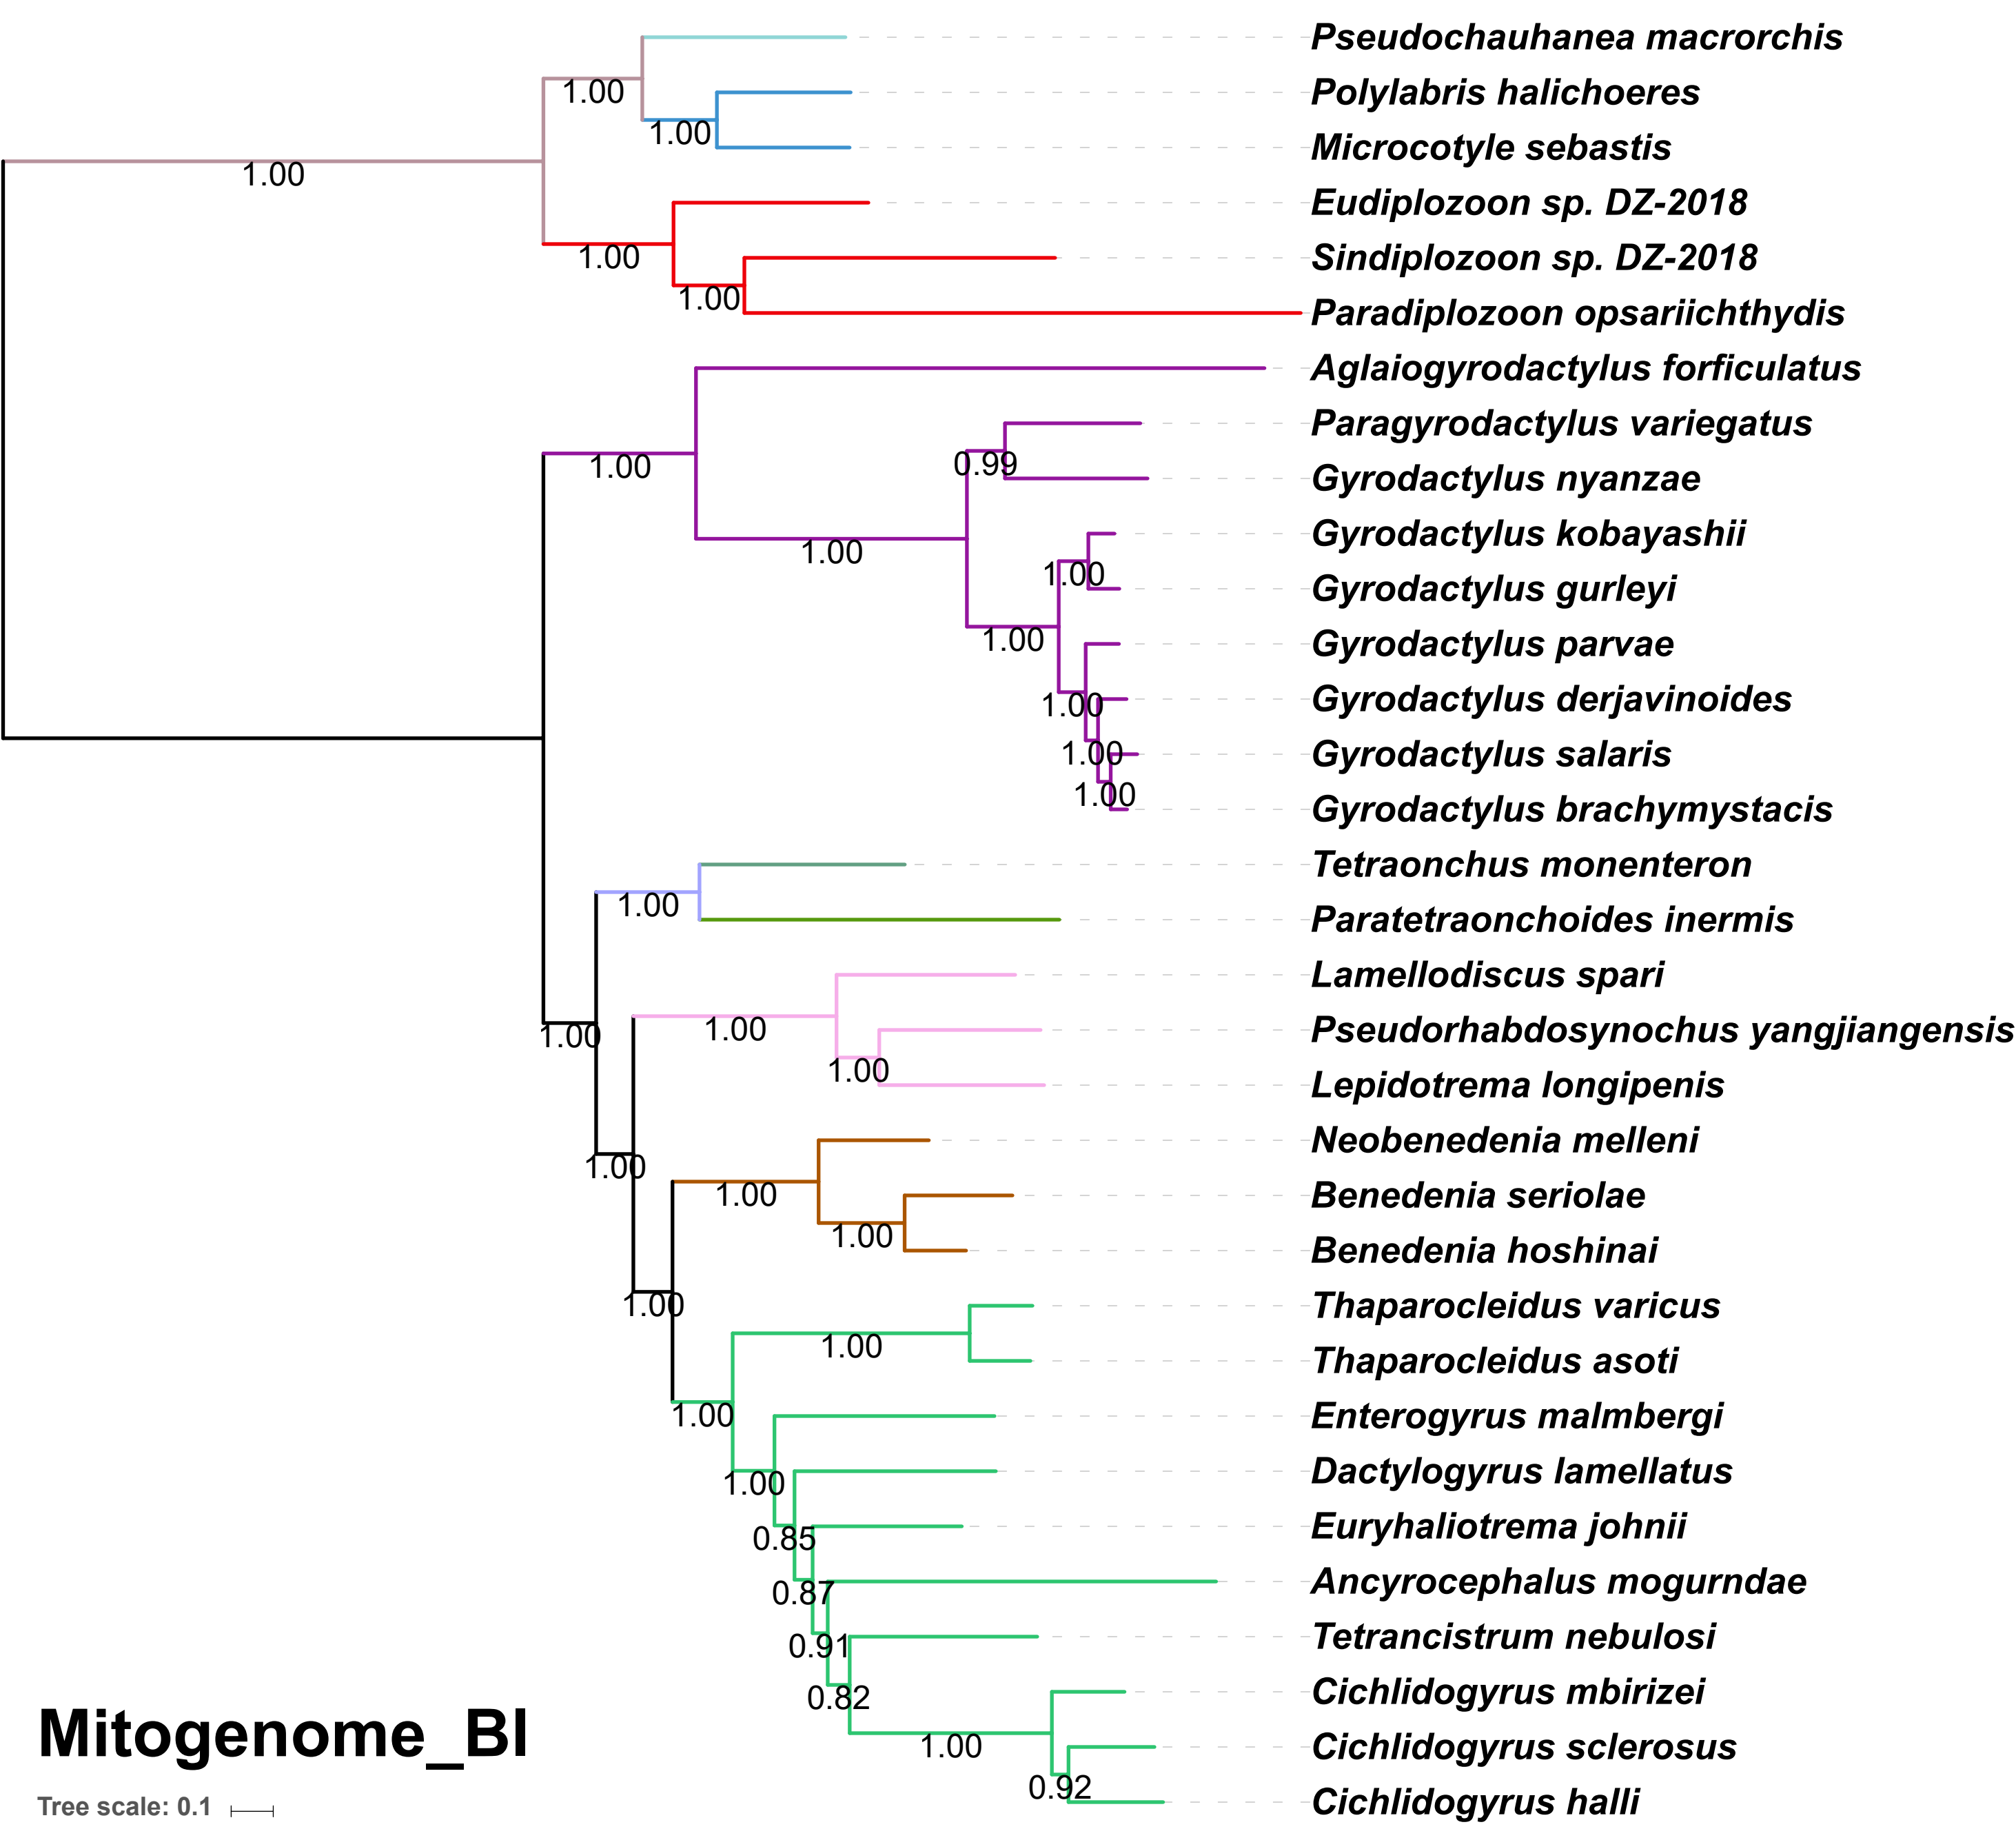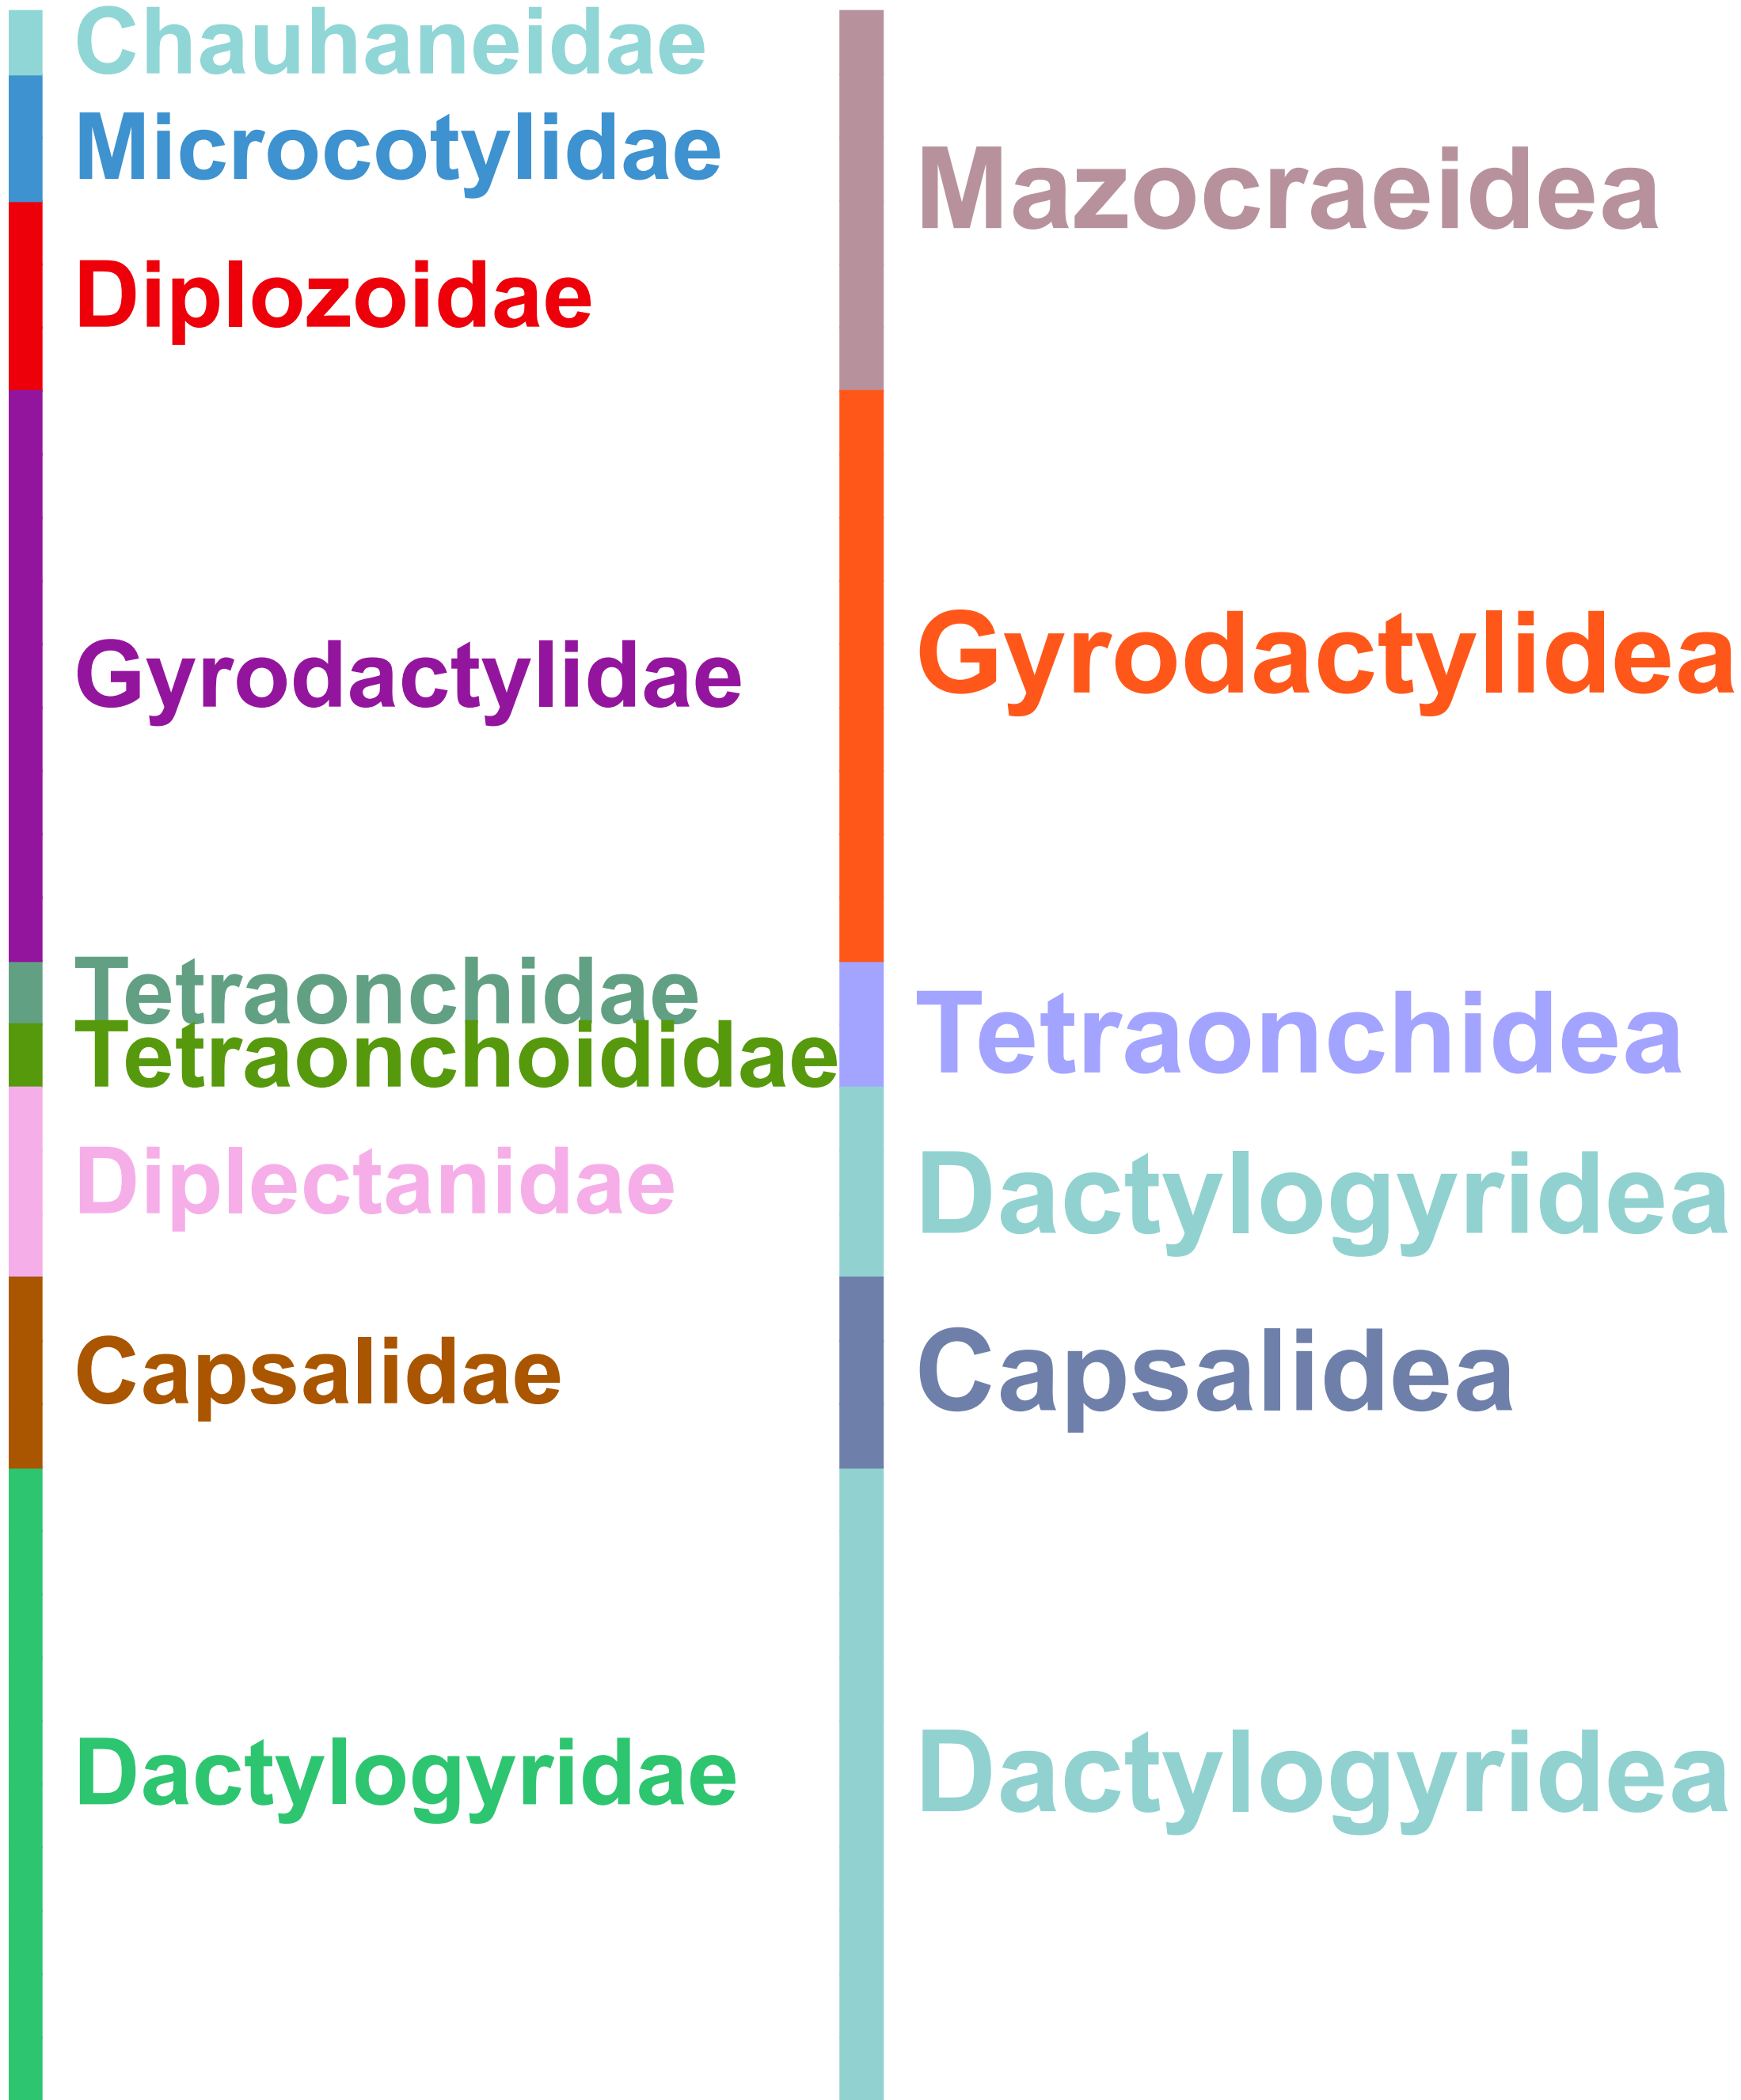

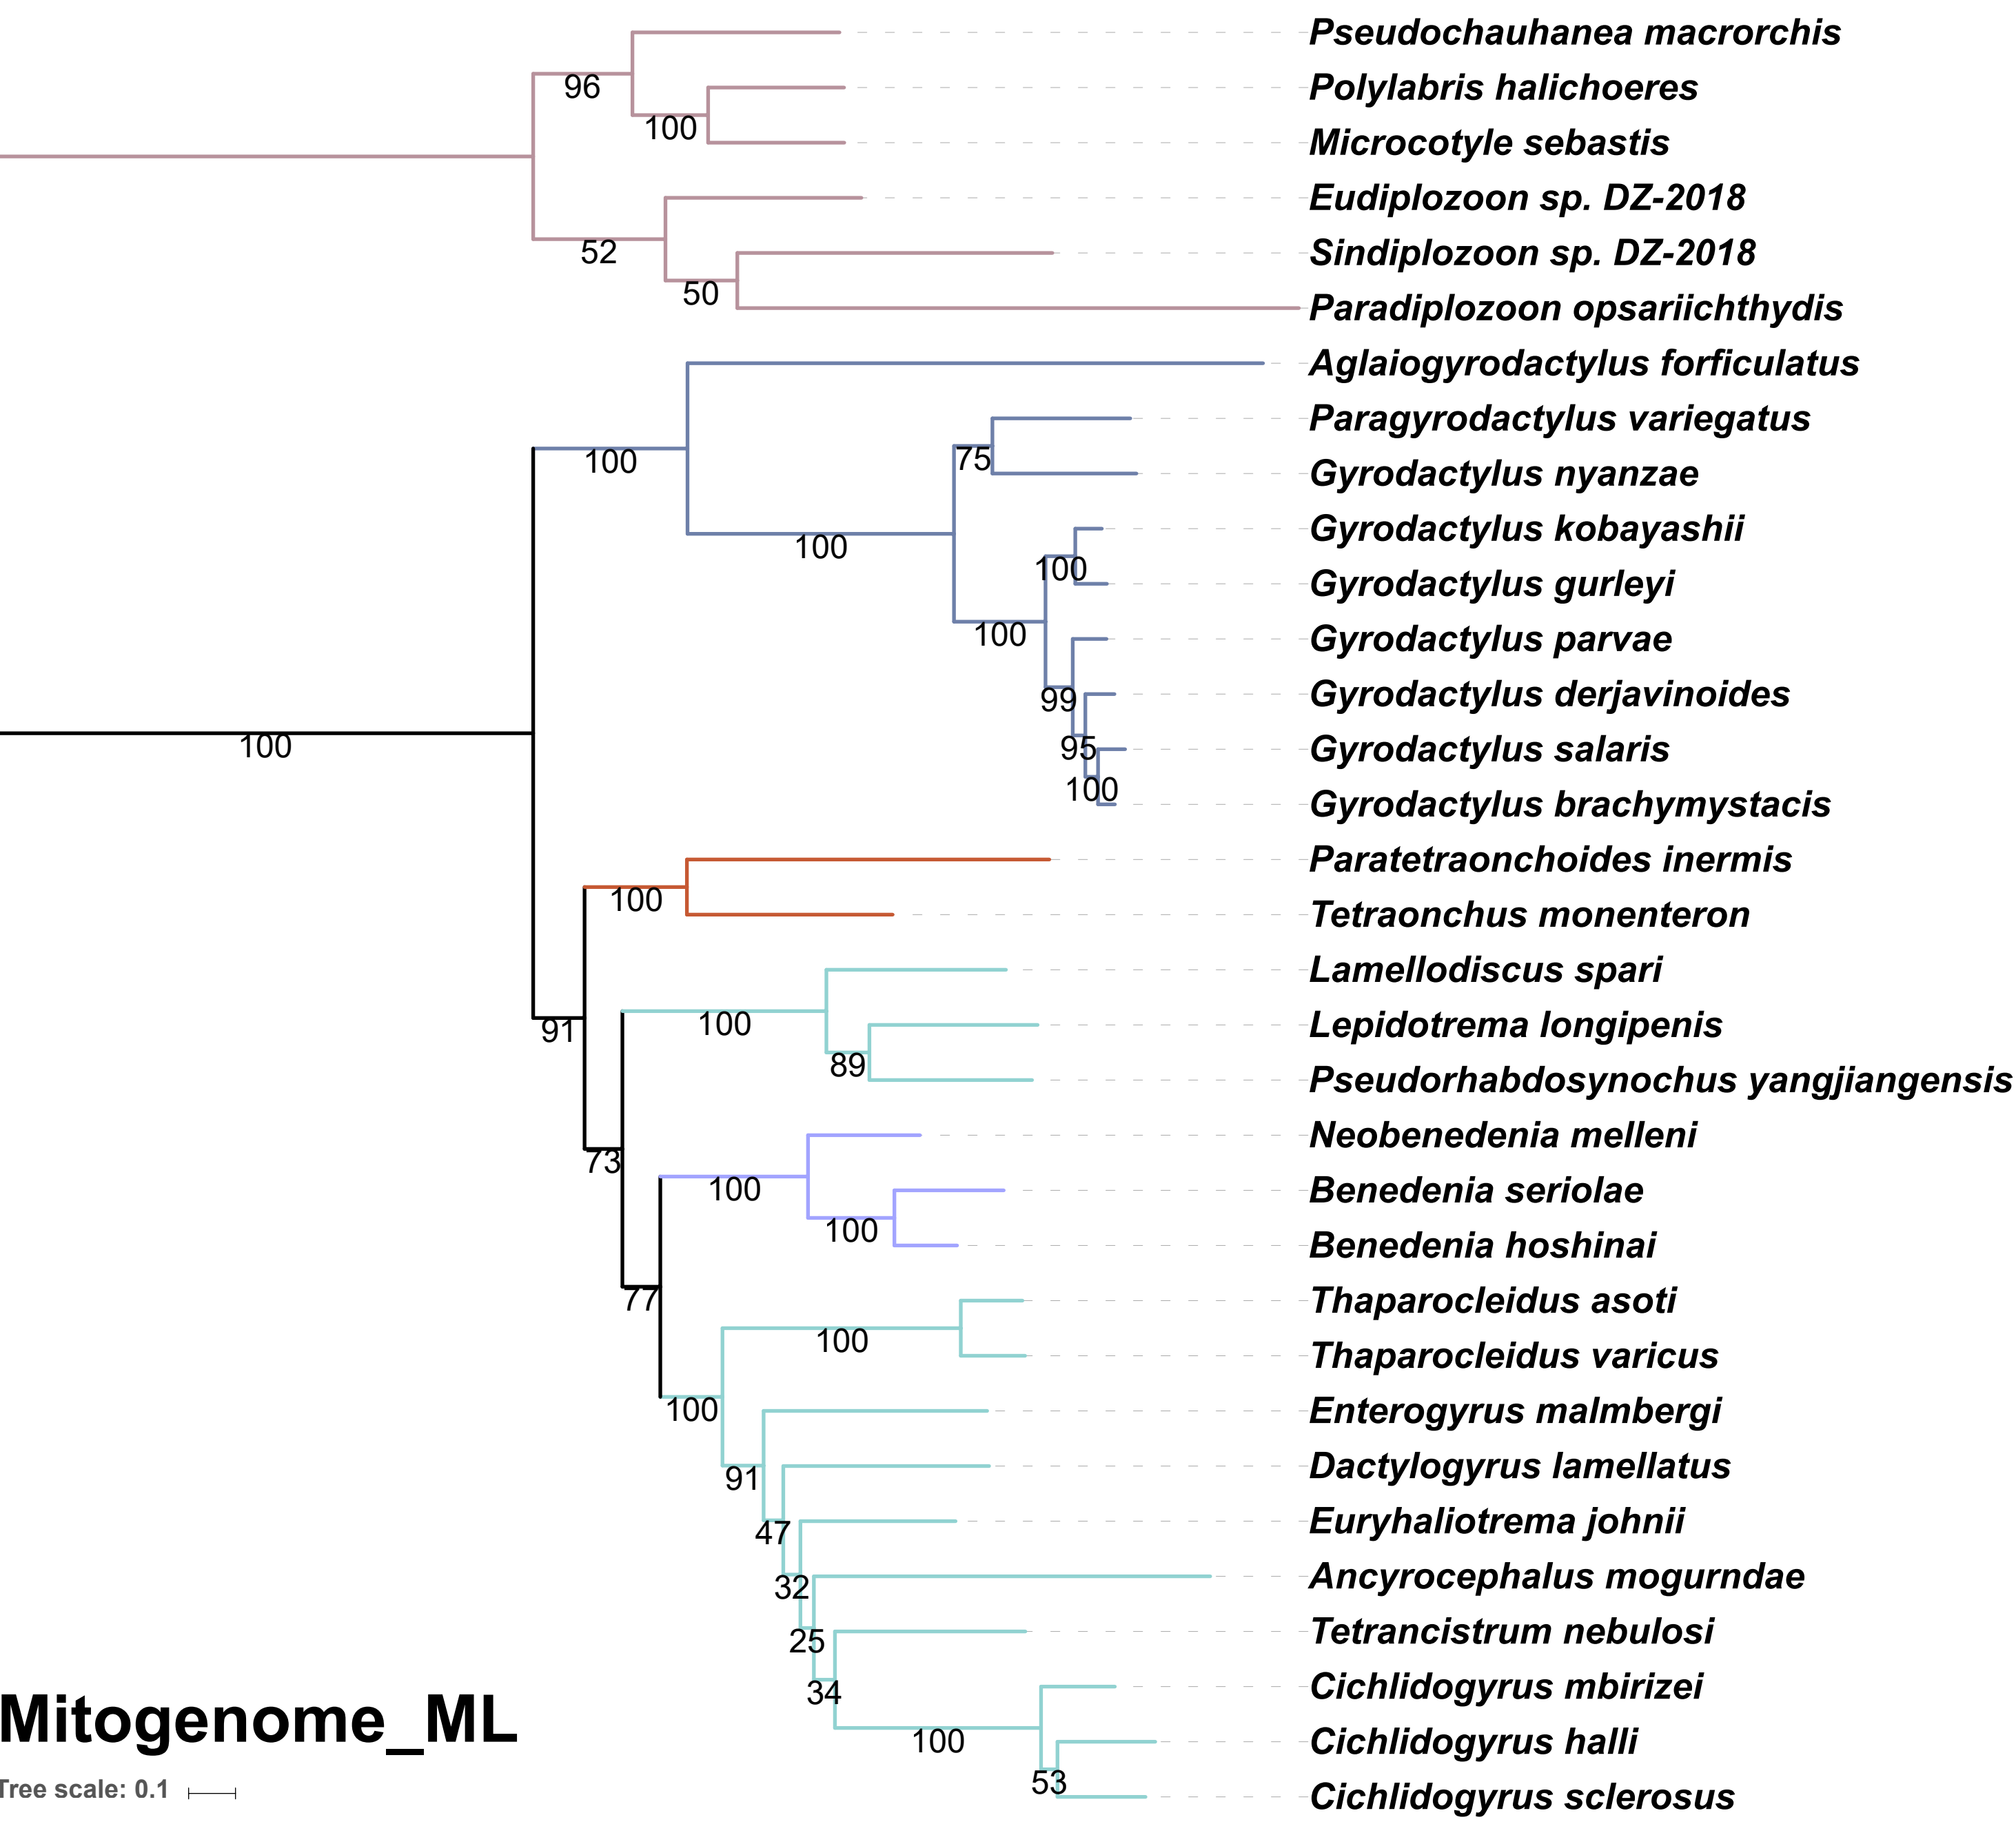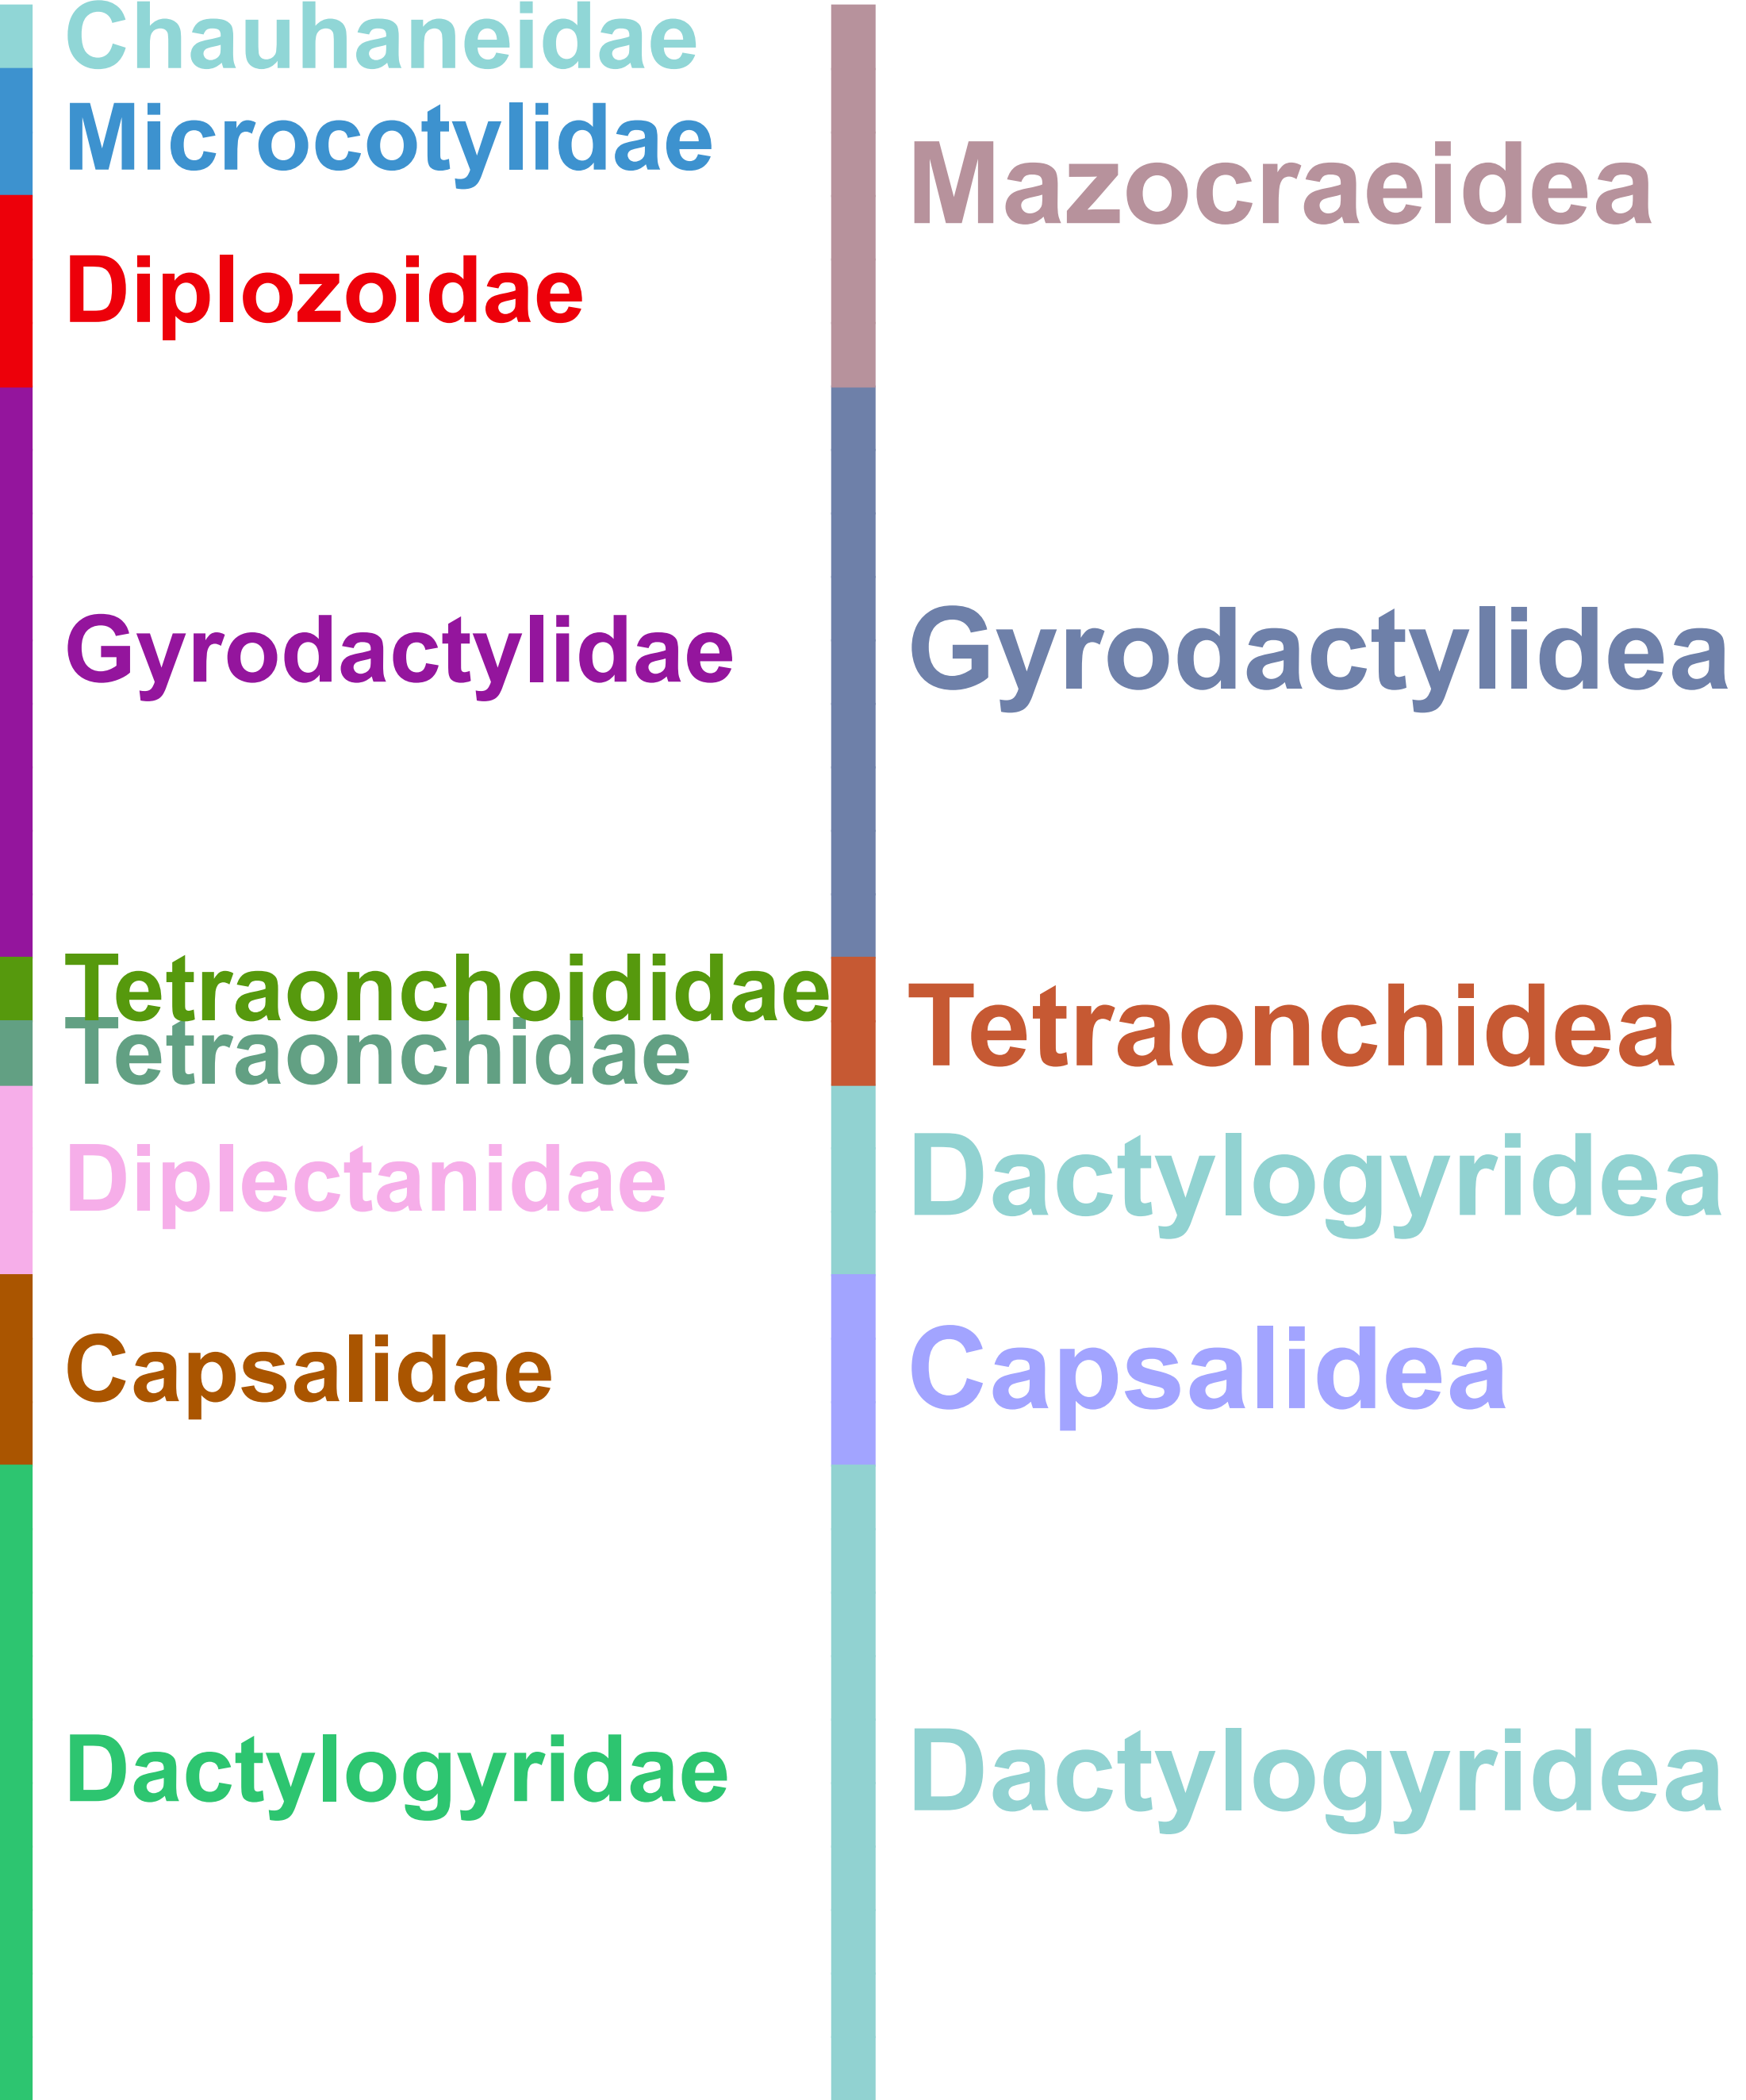

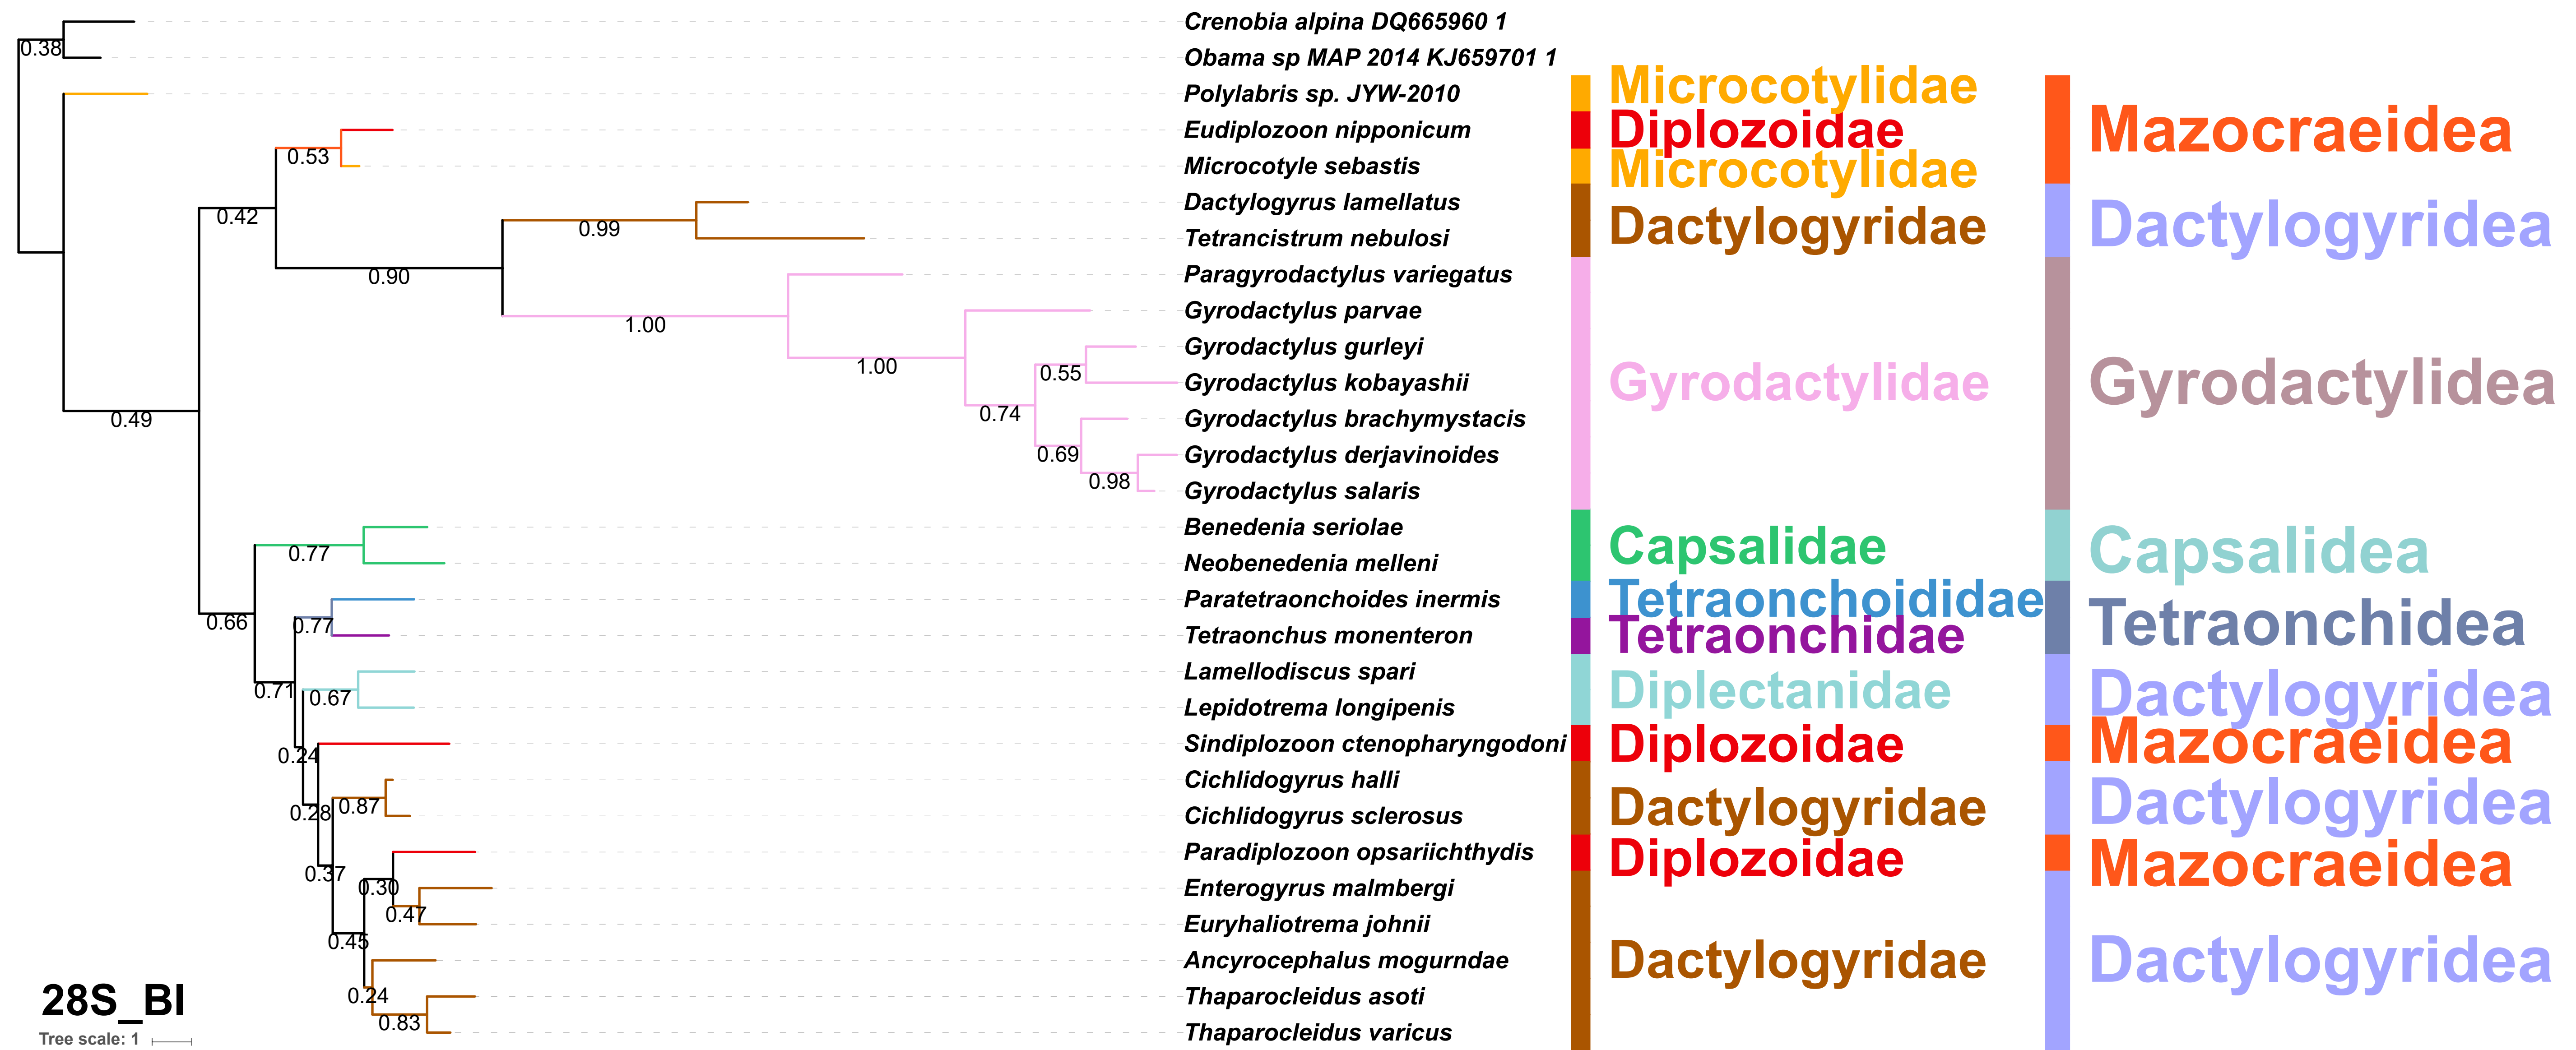



28S\_ML

Tree scale: 1

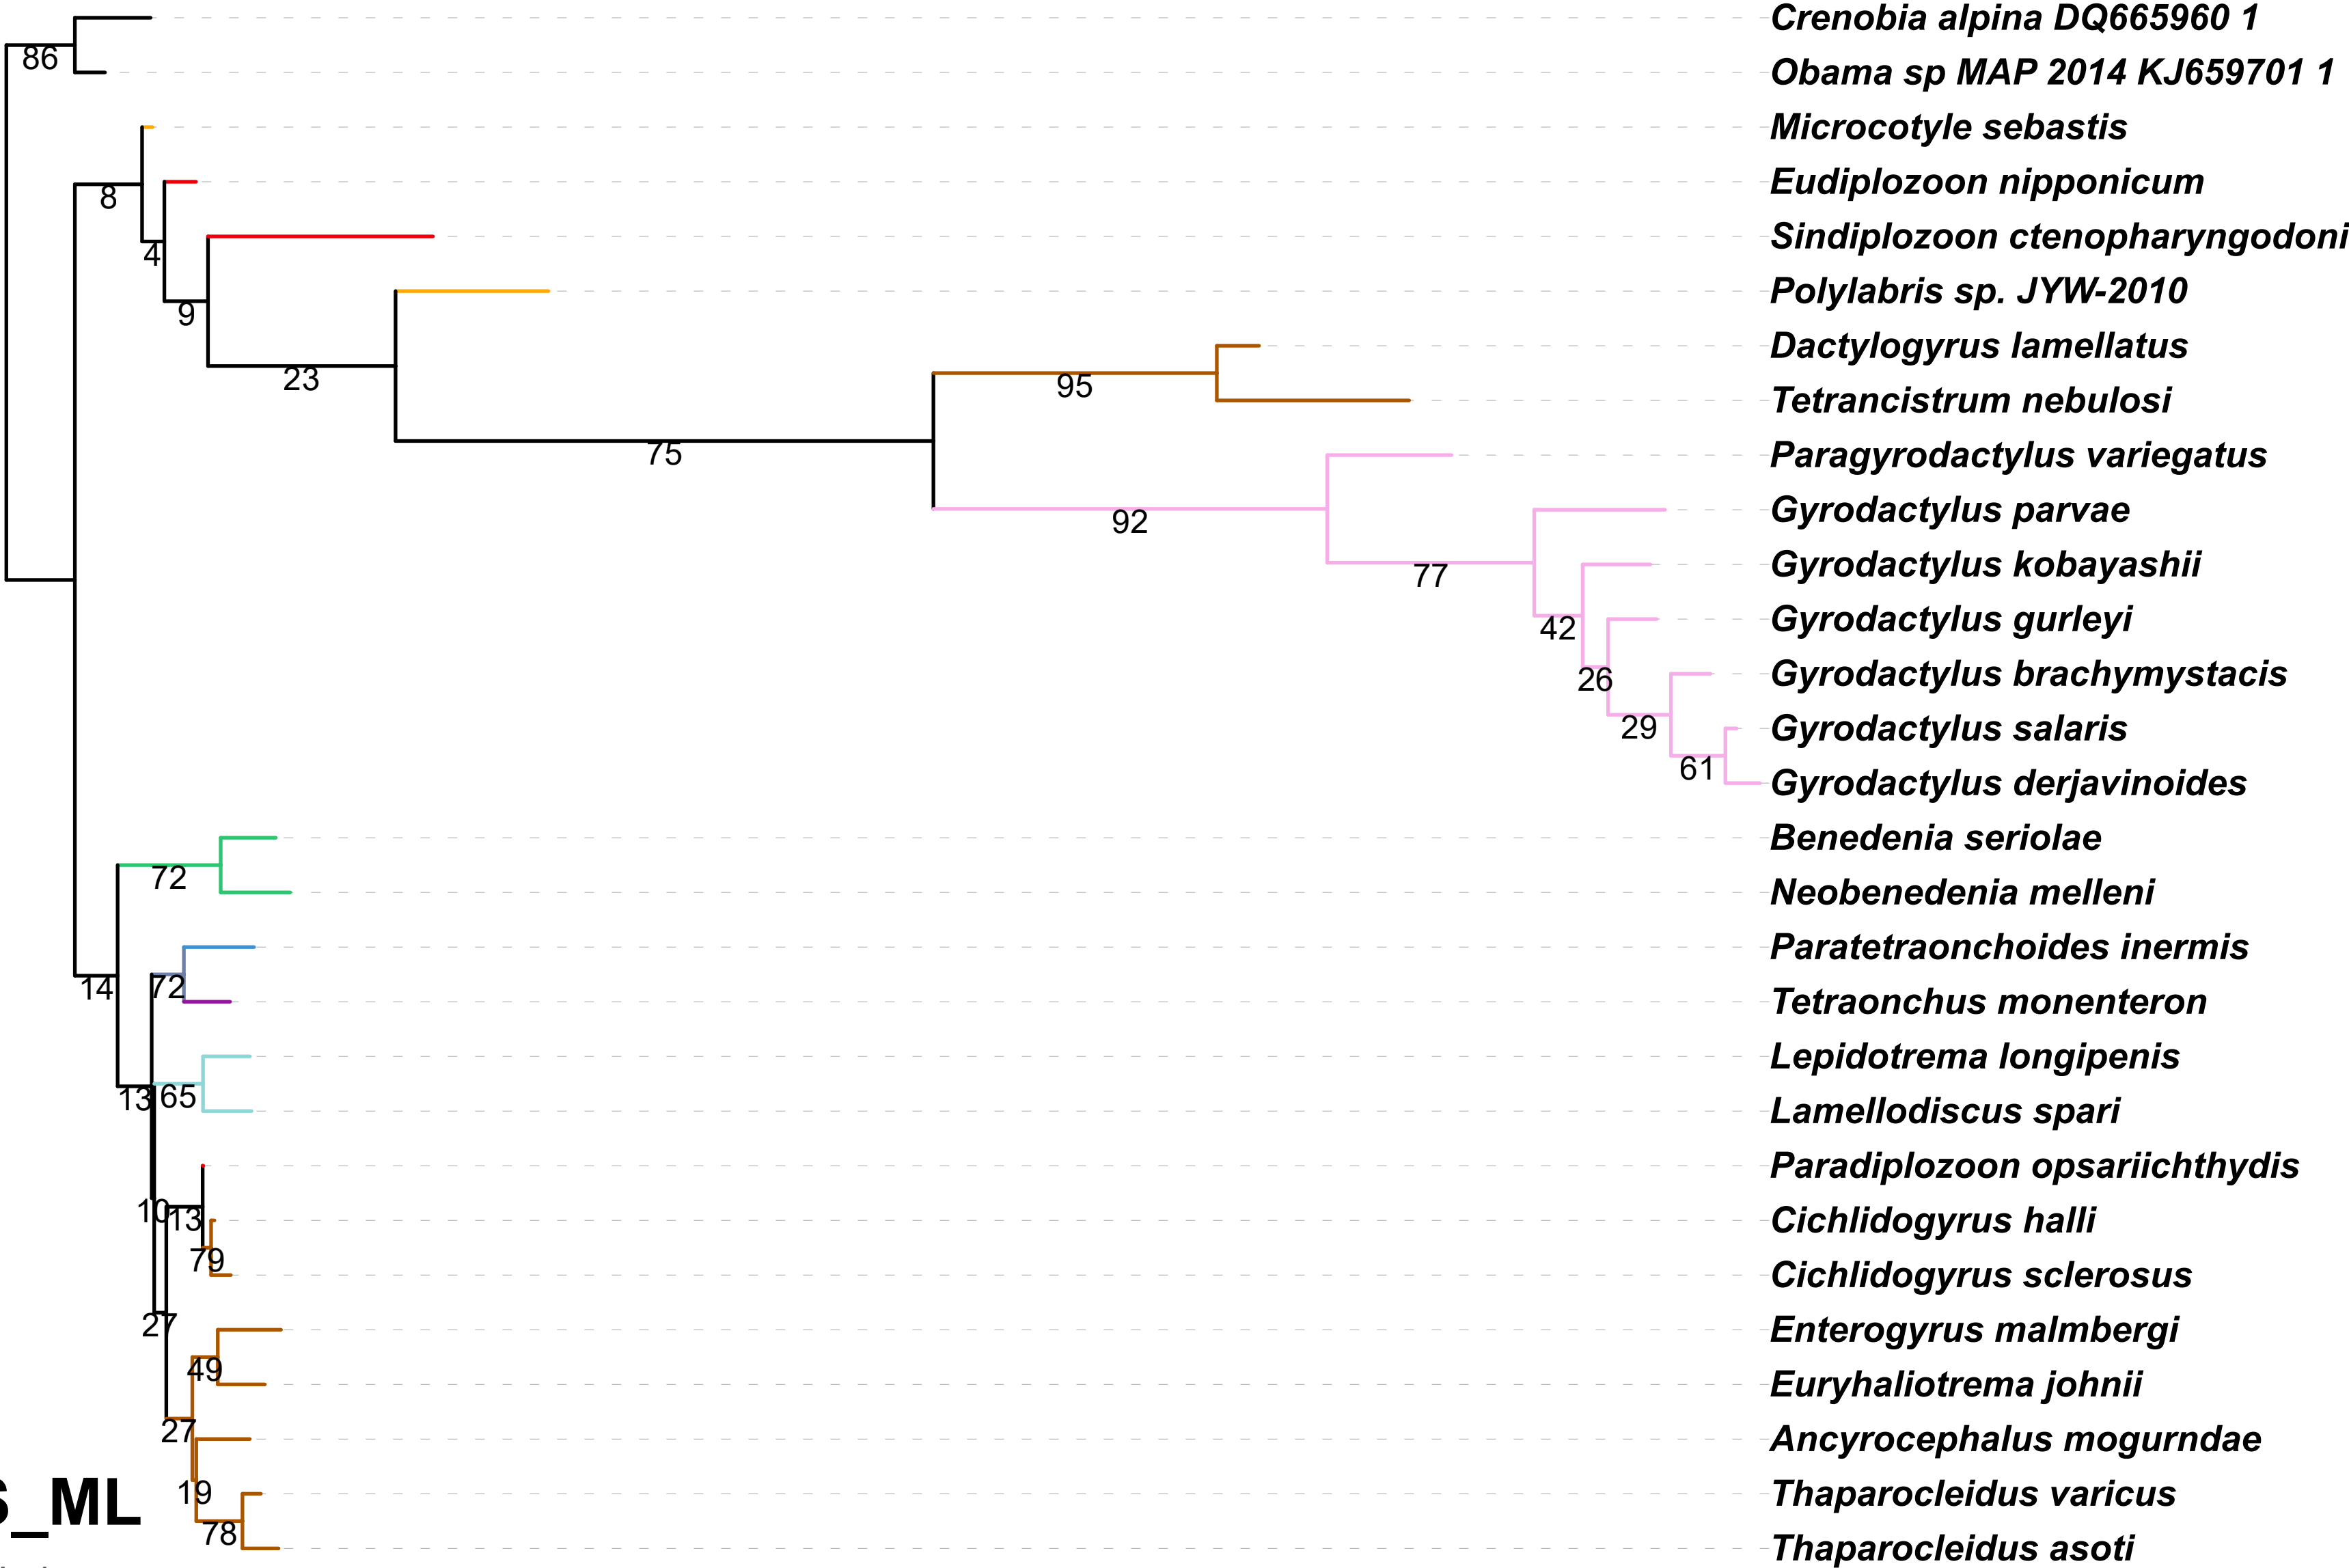

Microcotylidae

Diplozoidae

Microcotylidae

Dactylogyridae

Gyrodactylidae

Capsalidae

Tetraonchooididae

Tetraonchidae

Diplectanidae

Diplozoidae

Dactylogyridae

Mazocraeidea

Dactylogyridea

Gyrodactylidea

Capsalidea

Tetraonchidea

Dactylogyridea

Mazocraeidea

Dactylogyridea
