# Supplementary material for: Mitochondrial Genomes of Two Thaparocleidus Species (Platyhelminthes: Monogenea) Reveal the First rRNA Gene Rearrangement among the Neodermata
Source: MDPI journal article supplement (doi:10.3390/ijms20174214), 2019-08-28
Supplement: s1 [file s1]

*Thaparocleidus varicus*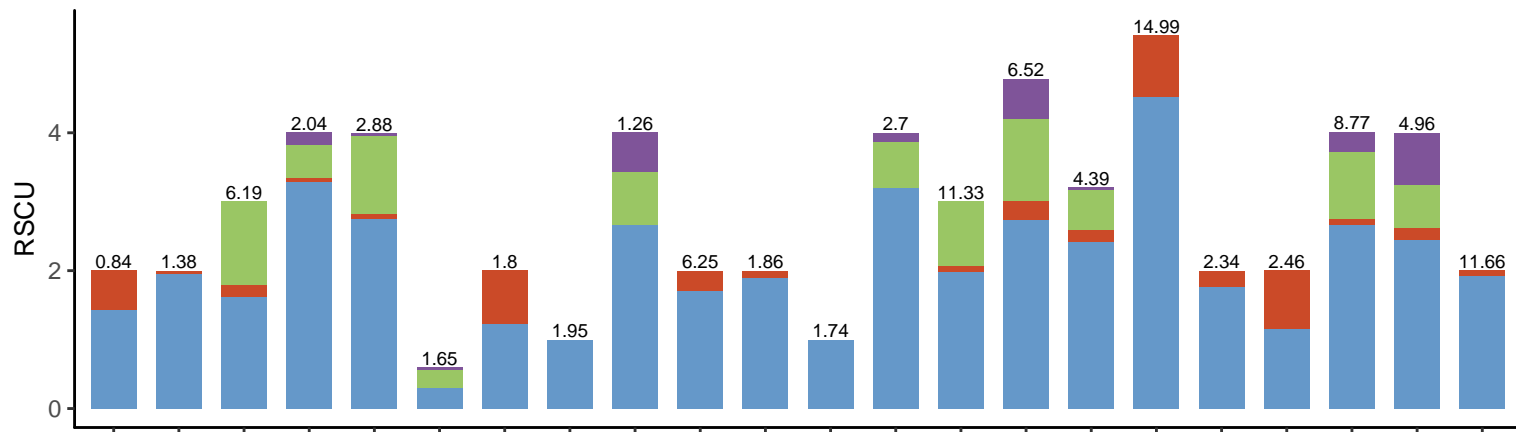*Thaparocleidus asoti*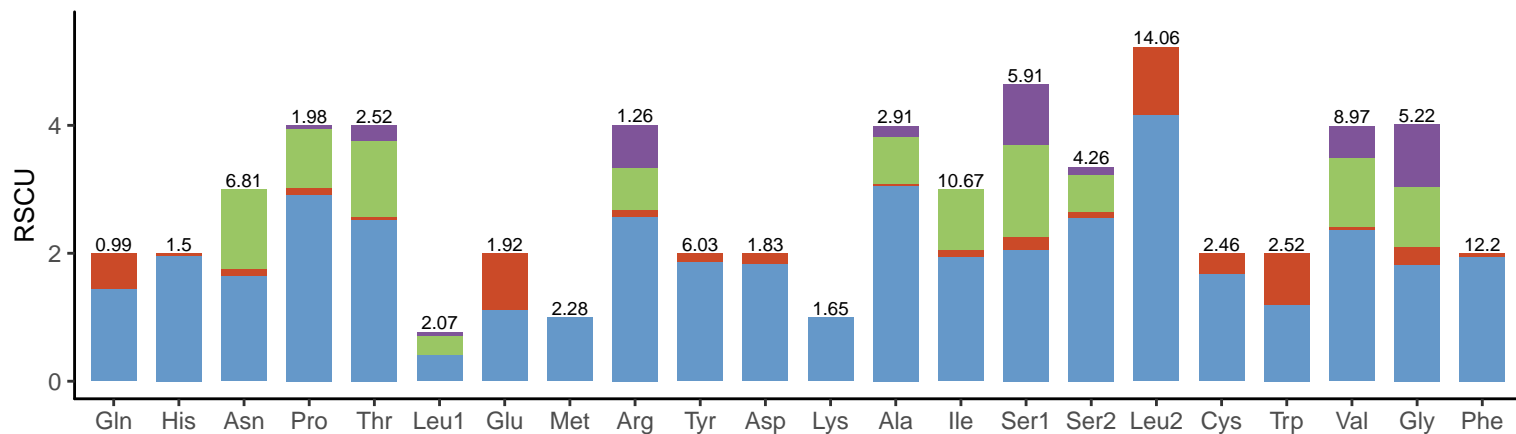

|     |     |     |     |     |     |     |     |     |     |     |     |     |     |     |     |     |     |     |     |     |     |
|-----|-----|-----|-----|-----|-----|-----|-----|-----|-----|-----|-----|-----|-----|-----|-----|-----|-----|-----|-----|-----|-----|
| CAA | CAU | AAU | CCU | ACU | CUU | GAA | AUG | CGU | UAU | GAU | AAG | GCU | AUU | AGU | UCU | UUA | UGU | UGA | GUU | GGU | UUU |
| CAG | CAC | AAC | CCC | ACC | CUC | GAG |     | CGC | UAC | GAC |     | GCC | AUC | AGC | UCC | UUG | UGC | UGG | GUC | GGC | UUC |
|     |     | AAA | CCA | ACA | CUA |     |     | CGA |     |     |     | GCA | AUA | AGA | UCA |     |     |     | GUA | GGA |     |
|     |     |     | CCG | ACG | CUG |     |     | CGG |     |     |     | GCG |     | AGG | UCG |     |     |     | GUG | GGG |     |
